20 **Main Text:**

21 Choices in important domains of life, including health, fertility, finance, employment, and social  
22 relationships, rarely have consequences that can be anticipated perfectly. The degree of  
23 variability in possible outcomes is called risk. Risk tolerance—defined as the willingness to take  
24 risks, typically to obtain some reward—varies substantially across humans and has been actively  
25 studied in the behavioral and social sciences. An individual’s risk tolerance may vary across  
26 domains, but survey-based measures of *general* risk tolerance (e.g., “Would you describe  
27 yourself as someone who takes risks?”) have been found to be good all-around predictors of  
28 risky behaviors such as portfolio allocation, occupational choice, smoking, drinking alcohol, and  
29 starting one’s own business<sup>1-3</sup>.

30 Twin studies have established that various measures of risk tolerance are moderately heritable  
31 ( $h^2 \sim 30\%$ , although estimates in the literature vary<sup>3-5</sup>). Discovery of specific genetic variants  
32 associated with general risk tolerance could advance our understanding of how genetic  
33 influences are amplified and dampened by environmental factors; provide insights into  
34 underlying biological pathways; enable the construction of polygenic scores (indexes of many  
35 genetic variants) that can be used as overall measures of genetic influences on individuals; and  
36 help distinguish genetic variation associated with general versus domain-specific risk tolerance.

37 Although risk tolerance has been one of the most studied phenotypes in social science genetics,  
38 most claims of positive findings have been based on small-sample candidate gene studies  
39 (**Supplementary Table 11.1**), whose limitations are now appreciated<sup>6</sup>. To date, only two loci  
40 associated with risk tolerance have been identified in genome-wide association studies  
41 (GWAS)<sup>7,8</sup>.

42 Here, we report results from large-scale GWAS of self-reported general risk tolerance (our  
43 primary phenotype) and six supplementary phenotypes: “adventurousness” (defined as the self-  
44 reported tendency to be adventurous vs. cautious); four risky behaviors: “automobile speeding  
45 propensity” (the tendency to drive faster than the speed limit), “drinks per week” (the average  
46 number of alcoholic drinks consumed per week), “ever smoker” (whether one has ever been a  
47 smoker), and “number of sexual partners” (the lifetime number of sexual partners); and the first  
48 principal component (PC) of these four risky behaviors, which we interpret as capturing the  
49 general tendency to take risks across domains. All seven phenotypes are coded such that higher

50 phenotype values are associated with higher risk tolerance or risk taking. **Table 1** lists, for each  
51 GWAS, the datasets we analyzed and the GWAS sample size.

52

### 53 Association analyses

54 All seven GWAS were performed in European-ancestry subjects, following procedures described  
55 in a pre-specified analysis plan (<https://osf.io/cjx9m/>) and in **Supplementary Information**  
56 **section 2**.

57 In the discovery phase of our GWAS of general risk tolerance ( $n = 939,908$ ), we performed a  
58 sample-size-weighted meta-analysis of results from the UK Biobank (UKB,  $n = 431,126$ ) and a  
59 sample of research participants from 23andMe ( $n = 508,782$ ). The UKB measure of general risk  
60 tolerance is based on the question: “Would you describe yourself as someone who takes risks?  
61 Yes / No.” The 23andMe measure is based on a question about overall comfort taking risks, with  
62 five response options ranging from “very comfortable” to “very uncomfortable.” The genetic  
63 correlation<sup>9</sup> between the UKB and 23andMe cohorts ( $\hat{r}_g = 0.77$ ,  $SE = 0.02$ ) is smaller than one  
64 but high enough to justify our approach of pooling the two cohorts<sup>10</sup>.

65 The Q-Q plot (**Extended Data Fig. 3.2a**) from the discovery GWAS exhibits substantial  
66 inflation ( $\lambda_{GC} = 1.41$ ). According to the estimated intercept from a linkage disequilibrium (LD)  
67 Score regression<sup>11</sup>, only a small share of this inflation (~5%) in test statistics is due to bias. To  
68 account for this bias, we inflated GWAS standard errors by the square root of the LD Score  
69 regression intercept.

70 We identified 124 approximately independent SNPs (pairwise  $r^2 < 0.1$ ) that attained genome-  
71 wide significance ( $P < 5 \times 10^{-8}$ ). These 124 “lead SNPs” are listed in **Supplementary Table 3.1**  
72 and shown in **Fig. 1a**. All have coefficients of determination ( $R^2$ 's) below 0.02%, and the SNP  
73 with the largest per-allele effect is estimated to increase general risk tolerance by ~0.026  
74 standard deviations in our discovery sample (**Extended Data Fig. 3.3**).

75 In the replication phase of our GWAS of general risk tolerance (combined  $n = 35,445$ ), we meta-  
76 analyzed summary statistics from ten smaller cohorts. Additional details on cohort-level  
77 phenotype measures are provided in **Supplementary Table 1.2**. The questions differ in terms of  
78 their exact wording and number of response categories, but all questions ask subjects about their

79 overall or general attitudes toward risk. The genetic correlation<sup>9</sup> between the discovery and  
80 replication GWAS is 0.83 ( $SE = 0.13$ ). 123 of the 124 lead SNPs were available or well proxied  
81 by an available SNP in the replication GWAS results. Out of the 123 SNPs, 94 have a  
82 concordant sign ( $P = 1.7 \times 10^{-9}$ ) and 23 are significant at the 5% level in one-tailed  $t$  tests ( $P =$   
83  $4.5 \times 10^{-8}$ ) (**Extended Data Fig. 5.1**). This empirical replication record matches theoretical  
84 projections that take into account sampling variation and the winner's curse (**Supplementary**  
85 **Information section 5**).

86 Our six supplementary GWAS—of adventurousness, four risky behaviors, and their principal  
87 component ( $n = 315,894$  to  $557,923$ ; **Supplementary Tables 1.1-1.2**)—were conducted using  
88 methods comparable to those in the primary GWAS, but without a replication phase. **Extended**  
89 **Data Fig. 3.2 (c to h)** shows Q-Q plots and **Extended Data Fig. 3.1 (a to f)** shows Manhattan  
90 plots.

91 **Table 1** provides a summary overview of the seven GWAS. We identified a total of 865 lead  
92 SNPs across the seven GWAS. The lead SNPs are located in 611 approximately independent  
93 loci, where a locus is defined as the set of all SNPs in weak LD (pairwise  $r^2 > 0.1$ ) with a lead  
94 SNP. The SNP heritabilities of the seven phenotypes range from  $\sim 0.05$  (for general risk  
95 tolerance) to  $\sim 0.16$  (for the first PC of the four risky behaviors).

96

### 97 Genetic overlap

98 There is substantial overlap across the results of our GWAS. For example, 72 of the 124 general-  
99 risk-tolerance lead SNPs are in loci that also contain lead SNPs for at least one of the other  
100 GWAS, including 45 for adventurousness and 49 for at least one of the four risky behaviors or  
101 their first PC. To empirically assess if this overlap could be attributed to chance, we conducted a  
102 resampling exercise under the null hypothesis that the lead SNPs of our supplementary GWAS  
103 are distributed independently of the 124 general-risk-tolerance lead loci. We strongly rejected  
104 this null hypothesis ( $P < 0.0001$ ; **Supplementary Information section 3.3.3**).

105 Several regions of the genome stand out for being associated both with general risk tolerance and  
106 with all or most of the supplementary phenotypes. We tested whether the signs of the lead SNPs  
107 located in these regions tend to be concordant across our primary and supplementary GWAS. We

108 strongly rejected the null hypothesis of no concordance ( $P < 3 \times 10^{-30}$ ; **Supplementary**  
109 **Information section 3.2.3**), suggesting that these regions represent shared genetic influences,  
110 rather than colocalization of causal SNPs. **Fig. 1b** and **Extended Data Fig. 3.4** show local  
111 Manhattan plots for some of these regions. The long-range LD region<sup>12</sup> on chromosome 3 (~83.4  
112 to 86.9 Mb) contains lead SNPs from all seven GWAS as well as the most significant lead SNP  
113 from the general risk tolerance GWAS, rs993137 ( $P = 2.14 \times 10^{-40}$ ), which is located in the gene  
114 *CADM2*. Another long-range LD region, on chromosome 6 (~25.3 to 33.4 Mb), covers the HLA-  
115 complex and contains lead SNPs from all GWAS except drinks per week. Three candidate  
116 inversions (i.e., genomic regions that are highly prone to inversion polymorphisms;  
117 **Supplementary Information section 2.9.2**) on chromosomes 7 (~124.6 to 132.7 Mb), 8 (~7.89  
118 to 11.8 Mb), and 18 (~49.1 to 55.5 Mb) contain lead SNPs from six, five, and all seven of our  
119 GWAS, respectively. Finally, four other LD blocks<sup>13</sup> that do not overlap known long-range LD  
120 or candidate inversion regions each contain lead SNPs from five of our GWAS (including  
121 general risk tolerance). The two long-range LD regions and the three candidate inversions have  
122 previously been found to be associated with numerous phenotypes, including many cognitive and  
123 neuropsychiatric phenotypes<sup>14</sup>.

124 To investigate genetic overlap at the genome-wide level, we estimated genetic correlations with  
125 self-reported general risk tolerance using bivariate LD Score regression<sup>9</sup>. (For this and all  
126 subsequent analyses involving general risk tolerance, we used the summary statistics from the  
127 combined meta-analysis of our discovery and replication GWAS.) The estimated genetic  
128 correlations with our six supplementary phenotypes are all positive, larger than ~0.25, and highly  
129 significant ( $P < 2.3 \times 10^{-30}$ ; **Fig. 2**), indicating that SNPs associated with higher general risk  
130 tolerance also tend to be associated with riskier behavior. The largest estimated genetic  
131 correlations are with adventurousness ( $\hat{r}_g = 0.83$ ,  $SE = 0.01$ ), number of sexual partners ( $0.52$ ,  $SE$   
132  $= 0.02$ ), automobile speeding propensity ( $0.45$ ,  $SE = 0.02$ ), and the first PC of the four risky  
133 behaviors ( $0.50$ ,  $SE = 0.02$ ).

134 Our estimates of the genetic correlations between general risk tolerance and the supplementary  
135 risky behaviors are substantially higher than the corresponding phenotypic correlations  
136 (**Supplementary Tables 1.3** and **7.1**). Although measurement error partly accounts for the low  
137 phenotypic correlations, the genetic correlations remain considerably higher even after

138 adjustment of the phenotypic correlations for measurement error. The comparatively large  
139 genetic correlations support the view that a general factor of risk tolerance partly accounts for  
140 cross-domain variation in risky behavior<sup>15,16</sup> and imply that this factor is genetically influenced.  
141 The lower phenotypic correlations suggest that environmental factors are more important  
142 contributors to domain-specific risky behavior<sup>17,18</sup>.

143 To increase the precision of our estimates of the SNPs' effects on general risk tolerance, we  
144 leveraged the high degree of genetic overlap across our phenotypes by conducting Multi-Trait  
145 Analysis of GWAS (MTAG)<sup>19</sup>. We used as inputs the summary statistics of our GWAS of  
146 general risk tolerance, of our first five supplementary GWAS (i.e., not including the first PC of  
147 the four risky behaviors), and of a previously published GWAS on lifetime cannabis use<sup>20</sup>  
148 (**Supplementary Information section 9**). MTAG increased the number of general-risk-tolerance  
149 lead SNPs from 124 to 312 (**Extended Data Fig. 9.1, Supplementary Table 9.1**).

150 We also estimated genetic correlations between general risk tolerance and 28 additional  
151 phenotypes (**Fig. 2** and in **Supplementary Table 7.1**). These included phenotypes for which we  
152 could obtain summary statistics from previous GWAS, as well as five phenotypes for which we  
153 conducted new GWAS. The estimated genetic correlations for the personality traits extraversion  
154 ( $\hat{r}_g = 0.51$ ,  $SE = 0.03$ ), neuroticism ( $-0.42$ ,  $SE = 0.04$ ), and openness to experience ( $0.33$ ,  $SE =$   
155  $0.03$ ) are substantially larger in magnitude than previously reported phenotypic correlations<sup>21</sup>,  
156 pointing to substantial shared genetic influences among general risk tolerance and these traits.  
157 After Bonferroni correction, we also find significant positive genetic correlations with the  
158 neuropsychiatric phenotypes ADHD, bipolar disorder, and schizophrenia. Viewed in light of the  
159 genetic correlations we find with risky behaviors classified as externalizing (e.g., substance use,  
160 elevated sexual behavior, and fast driving), these results suggest the hypothesis that the overlap  
161 with the neuropsychiatric phenotypes is driven by their externalizing component.

162

### 163 Biological annotation

164 To gain insights into the biological mechanisms through which genetic variation influences  
165 general risk tolerance, we conducted a number of analyses. First, we systematically reviewed the  
166 literature that aimed to link risk tolerance to biological pathways (**Supplementary Information**  
167 **section 11**). Our review covered studies based on candidate genes (i.e., specific genetic variants

168 used as proxies for biological pathways), pharmacological manipulations, biochemical assays,  
169 genetic manipulations in rodents, as well as other research designs. Our review identified 132  
170 articles that matched our search criteria (**Supplementary Table 11.1**).

171 Previous work has focused on five main biological pathways: the steroid hormone cortisol, the  
172 monoamines dopamine and serotonin, and the steroid sex hormones estrogen and testosterone.  
173 Using a MAGMA<sup>22</sup> competitive gene-set analysis, we found no evidence that SNPs within genes  
174 associated with these five pathways tend to be more associated with general risk tolerance than  
175 SNPs in other genes (**Supplementary Table 11.3**). Further, none of the other bioinformatics  
176 analyses we report below point to these pathways.

177 We also examined the 15 most commonly tested autosomal genes within the dopamine and  
178 serotonin pathways, which were the focus of most of the 34 candidate-gene studies identified by  
179 our literature review. We verified that the SNPs available in our GWAS results tag most of the  
180 genetic variants typically used to test the 15 genes. Across one SNP-based test and two gene-  
181 based tests, we found no evidence of non-negligible associations between those genes and  
182 general risk tolerance (**Fig. 1c** and **Supplementary Table 11.4**). (We note, however, that some  
183 brain regions identified in analyses we report below are areas where dopamine and serotonin  
184 play important roles.)

185 Second, we performed a MAGMA<sup>22</sup> gene analysis to test each of ~18,000 protein-coding genes  
186 for association with general risk tolerance (**Supplementary Information section 12.2**). After  
187 Bonferroni correction, 285 genes were significant (**Extended Data Fig. 12.1** and  
188 **Supplementary Table 12.3**). To gain insight into the functions and expression patterns of these  
189 285 genes, we looked up these genes in the Gene Network<sup>23</sup> co-expression database. Third, to  
190 identify relevant biological pathways and identify tissues in which genes near general-risk-  
191 tolerance-associated SNPs are expressed, we applied the software tool DEPICT<sup>24</sup> to the SNPs  
192 with  $P$  values less than  $10^{-5}$  in our GWAS of general risk tolerance (**Supplementary**  
193 **Information section 12.4**).

194 Both the Gene Network and the DEPICT analyses separately point to a role for glutamate and  
195 GABA neurotransmitters, which are the main excitatory and inhibitory neurotransmitters in the  
196 brain, respectively<sup>25</sup> (**Fig. 3a** and **Supplementary Tables 12.4** and **12.8**). To our knowledge, no  
197 published large-scale GWAS of cognition, personality, or neuropsychiatric phenotypes has

198 pointed to clear roles both for glutamate and GABA (although glutamatergic neurotransmission  
199 has been implicated in recent GWAS of schizophrenia<sup>26</sup> and major depression<sup>27</sup>). Our results  
200 suggest that the balance between excitatory and inhibitory neurotransmission may contribute to  
201 variation in general risk tolerance across individuals.

202 The Gene Network and the DEPICT tissue enrichment analyses also both separately point to  
203 enrichment of the prefrontal cortex and the basal ganglia (**Fig. 3b** and **Supplementary Tables**  
204 **12.4, 12.6, and 12.7**). The cortical and subcortical regions highlighted by DEPICT include some  
205 of the major components of the cortical-basal ganglia circuit, which is known as the reward  
206 system in human and non-human primates and is critically involved in learning, motivation, and  
207 decision-making, notably under risk and uncertainty<sup>28,29</sup>. We caution, however, that our results  
208 do not point exclusively to the reward system.

209 Lastly, we used stratified LD Score regression<sup>30</sup> to test for the enrichment of SNPs associated  
210 with histone marks in 10 tissue or cell types (**Supplementary Information section 12.1**).  
211 Central nervous system tissues are the most enriched, accounting for 44% ( $SE = 3\%$ ) of the  
212 heritability while comprising only 15% of the SNPs (**Extended Data Fig. 12.3a** and  
213 **Supplementary Table 12.2**). Immune/hematopoietic tissues are also significantly enriched.  
214 While a role for the immune system in modulating risk tolerance is plausible given prior  
215 evidence of its involvement in several neuropsychiatric disorders<sup>26,27</sup>, future work is needed to  
216 confirm this result and to uncover specific pathways that might be involved.

217

### 218 Polygenic prediction

219 We constructed polygenic scores of general risk tolerance to gauge their potential usefulness in  
220 empirical research (**Supplementary Information section 10**). We used the Add Health, HRS,  
221 NTR, STR, UKB-siblings, and Zurich cohorts as validation cohorts (**Supplementary Table 1.1**  
222 provides an overview of these cohorts; the UKB-siblings cohort comprised individuals with at  
223 least one full sibling in the UKB). For each validation cohort, we constructed the score using  
224 summary statistics from a meta-analysis of our discovery and replication GWAS that excluded  
225 the cohort. Our measure of predictive power is the incremental  $R^2$  (or pseudo- $R^2$ ) from adding  
226 the score to a regression of the phenotype on sex, birth year, and the top ten principal  
227 components of the genetic relatedness matrix.



228 Our preferred score was constructed with LDpred<sup>31</sup>. In the UKB-siblings cohort, which is our  
229 largest validation cohort ( $n \sim 35,000$ ), the score's predictive power is 1.6% for general risk  
230 tolerance, 1.0% for the first PC of the four risky behaviors, 0.8% for number of sexual partners,  
231 0.6% for automobile speeding propensity, and  $\sim 0.15\%$  for drinks per week and ever smoker.  
232 Across our validation cohorts, the score is also predictive of several personality phenotypes and a  
233 suite of real-world measures of risky behaviors in the health, financial, career, and other domains  
234 (**Extended Data Figs. 10.1-10.2** and **Supplementary Tables 10.1-10.3**). The incremental  $R^2$  we  
235 observe for general risk tolerance is consistent with the theoretical prediction, given the SNP  
236 heritability of general risk tolerance (**Table 1**) and the imperfect genetic correlations across the  
237 GWAS and validation cohorts<sup>32,33</sup> (**Supplementary Information section 10.4**).

238

## 239 Discussion

240 Our results provide insights into biological mechanisms that influence general risk tolerance. Our  
241 bioinformatics analyses point to the role of gene expression in brain regions that have been  
242 identified by neuroscientific studies on decision-making, notably the prefrontal cortex, basal  
243 ganglia, and midbrain, thereby providing convergent evidence with that from neuroscience<sup>28,29</sup>.  
244 Yet our analyses failed to find evidence for the main biological pathways that had been  
245 previously hypothesized to influence risk tolerance. Instead, our analyses implicate genes  
246 involved in glutamatergic and GABAergic neurotransmission, which were heretofore not  
247 generally believed to play a role in risk tolerance.

248 Although our focus has been on the genetics of general risk tolerance and risky behaviors,  
249 environmental and demographic factors account for a substantial share of these phenotypes'  
250 variation. We observe sizeable effects of sex and age on general risk tolerance in the UKB data  
251 (**Extended Data Fig. 1.1**), and life experiences have been shown to affect both measured risk  
252 tolerance and risky behaviors (e.g., refs. 34,35). The data we have generated will allow  
253 researchers to construct and use polygenic scores of general risk tolerance to measure how  
254 environmental, demographic, and genetic factors interact with one another.

255 For the behavioral sciences, our results bear on the ongoing debate about the extent to which risk  
256 tolerance is a “domain-general” as opposed to a “domain-specific” trait. Low phenotypic  
257 correlations in risk tolerance across decision-making domains have been interpreted as

258 supporting the domain-specific view<sup>17,18</sup>. Across the risky behaviors we study, we find that the  
259 genetic correlations are considerably higher than the phenotypic correlations (even after the latter  
260 are corrected for measurement error) and that many lead SNPs are shared across our phenotypes.  
261 These observations suggest that the low phenotypic correlations across domains are due to  
262 environmental factors that dilute the effects of a genetically-influenced domain-general factor of  
263 risk tolerance.

264 **References:**

- 265 1. Dohmen, T. *et al.* Individual risk attitudes: Measurement, determinants, and behavioral  
266 consequences. *J. Eur. Econ. Assoc.* **9**, 522–550 (2011).
- 267 2. Falk, A., Dohmen, T., Falk, A. & Huffman, D. The nature and predictive power of  
268 preferences: Global evidence. *IZA Discussion Papers* (2015).
- 269 3. Beauchamp, J. P., Cesarini, D. & Johannesson, M. The psychometric and empirical  
270 properties of measures of risk preferences. *J. Risk Uncertain.* **54**, 203–237 (2017).
- 271 4. Cesarini, D., Dawes, C. T., Johannesson, M., Lichtenstein, P. & Wallace, B. Genetic  
272 variation in preferences for giving and risk taking. *Q. J. Econ.* **124**, 809–842 (2009).
- 273 5. Harden, K. P. *et al.* Beyond dual systems: A genetically-informed, latent factor model of  
274 behavioral and self-report measures related to adolescent risk-taking. *Dev. Cogn.*  
275 *Neurosci.* **25**, 221–234 (2017).
- 276 6. Hewitt, J. K. Editorial policy on candidate gene association and candidate gene-by-  
277 environment interaction studies of complex traits. *Behav. Genet.* **42**, 1–2 (2012).
- 278 7. Day, F. R. *et al.* Physical and neurobehavioral determinants of reproductive onset and  
279 success. *Nat. Genet.* **48**, 617–623 (2016).
- 280 8. Strawbridge, R. J. *et al.* Genome-wide analysis of risk-taking behaviour and cross-  
281 disorder genetic correlations in 116 255 individuals from the UK Biobank cohort. *bioRxiv*  
282 (2017). doi:<http://dx.doi.org/10.1101/177014>
- 283 9. Bulik-Sullivan, B. K. *et al.* An atlas of genetic correlations across human diseases and  
284 traits. *Nat. Genet.* **47**, 1236–1241 (2015).
- 285 10. Okbay, A. *et al.* Genetic variants associated with subjective well-being, depressive  
286 symptoms, and neuroticism identified through genome-wide analyses. *Nat. Genet.* **48**,  
287 624–633 (2016).
- 288 11. Bulik-Sullivan, B. K. *et al.* LD Score regression distinguishes confounding from  
289 polygenicity in genome-wide association studies. *Nat. Genet.* **47**, 291–295 (2015).
- 290 12. Price, A. L. *et al.* Long-range LD can confound genome scans in admixed populations.  
291 *Am. J. Hum. Genet.* **83**, 132–139 (2008).
- 292 13. Berisa, T. & Pickrell, J. K. Approximately independent linkage disequilibrium blocks in  
293 human populations. *Bioinformatics* **32**, 283–285 (2016).
- 294 14. Welter, D. *et al.* The NHGRI GWAS Catalog, a curated resource of SNP-trait

- 295 associations. *Nucleic Acids Res.* **42**, D1001-1006 (2014).
- 296 15. Einav, B. L., Finkelstein, A., Pascu, I. & Cullen, M. R. How general are risk preferences?  
297 Choices under uncertainty in different domains. *Am. Econ. Rev.* **102**, 2606–2638 (2016).
- 298 16. Frey, R., Pedroni, A., Mata, R., Rieskamp, J. & Hertwig, R. Risk preference shares the  
299 psychometric structure of major psychological traits. *Sci. Adv.* **3**, e1701381 (2017).
- 300 17. Weber, E. U., Blais, A. E. & Betz, N. E. A domain-specific risk-attitude scale: Measuring  
301 risk perceptions and risk behaviors. *J. Behav. Decis. Mak. J. Behav. Dec. Mak.* **15**, 263–  
302 290 (2002).
- 303 18. Hanoch, Y., Johnson, J. G. & Wilke, A. Domain specificity in experimental measures and  
304 participant recruitment: an application to risk-taking behavior. *Psychol. Sci.* **17**, 300–304  
305 (2006).
- 306 19. Turley, P. *et al.* MTAG: Multi-Trait Analysis of GWAS. *bioRxiv* (2017).  
307 doi:<https://doi.org/10.1101/118810>
- 308 20. Stringer, S. *et al.* Genome-wide association study of lifetime cannabis use based on a large  
309 meta-analytic sample of 32 330 subjects from the International Cannabis Consortium.  
310 *Transl. Psychiatry* **6**, e769 (2016).
- 311 21. Becker, A., Deckers, T., Dohmen, T., Falk, A. & Kosse, F. The relationship between  
312 economic preferences and psychological personality measures. *Annu. Rev. Econom.* **4**,  
313 453–478 (2012).
- 314 22. de Leeuw, C. A., Mooij, J. M., Heskes, T. & Posthuma, D. MAGMA: Generalized gene-  
315 set analysis of GWAS data. *PLoS Comput. Biol.* **11**, 1–19 (2015).
- 316 23. Fehrmann, R. S. N. *et al.* Gene expression analysis identifies global gene dosage  
317 sensitivity in cancer. *Nat. Genet.* **47**, 115–125 (2015).
- 318 24. Pers, T. H. *et al.* Biological interpretation of genome-wide association studies using  
319 predicted gene functions. *Nat. Commun.* **6**, 5890 (2015).
- 320 25. Petroff, O. A. C. GABA and glutamate in the human brain. *Neurosci.* **8**, 562–573 (2002).
- 321 26. Ripke, S. *et al.* Biological insights from 108 schizophrenia-associated genetic loci. *Nature*  
322 **511**, 421–427 (2014).
- 323 27. Wray, N. R. *et al.* Genome-wide association analyses identify 44 risk variants and refine  
324 the genetic architecture of major depression. *bioRxiv* (2017).  
325 doi:<https://doi.org/10.1101/167577>

- 326 28. Haber, S. N. & Knutson, B. The reward circuit: linking primate anatomy and human  
327 imaging. *Neuropsychopharmacology* **35**, 4–26 (2010).
- 328 29. Tobler, P. N. & Weber, E. U. Valuation for Risky and Uncertain Choices. in  
329 *Neuroeconomics* 149–172 (Elsevier, 2014). doi:10.1016/B978-0-12-416008-8.00009-7
- 330 30. Finucane, H. K. *et al.* Partitioning heritability by functional annotation using genome-  
331 wide association summary statistics. *Nat. Genet.* **47**, 1228–1235 (2015).
- 332 31. Vilhjálmsson, B. J. *et al.* Modeling linkage disequilibrium increases accuracy of polygenic  
333 risk scores. *Am. J. Hum. Genet.* **97**, 576–592 (2015).
- 334 32. Daetwyler, H. D., Villanueva, B. & Woolliams, J. A. Accuracy of predicting the genetic  
335 risk of disease using a genome-wide approach. *PLoS One* **3**, e3395 (2008).
- 336 33. de Vlaming, R. *et al.* Meta-GWAS Accuracy and Power (MetaGAP) calculator shows that  
337 hiding heritability is partially due to imperfect genetic correlations across studies. *PLoS*  
338 *Genet.* **13**, e1006495 (2017).
- 339 34. Sahm, C. R. How much does risk tolerance change? *Q. J. Financ.* **2**, 1250020 (2012).
- 340 35. Malmendier, U. & Nagel, S. Depression babies: Do macroeconomic experiences affect  
341 risk taking? *Q. J. Econ.* **126**, 373–416 (2011).
- 342 36. Frey, B. J. & Dueck, D. Clustering by passing messages between data points. *Science*  
343 **315**, (2007).
- 344 37. Furberg, H. *et al.* Genome-wide meta-analyses identify multiple loci associated with  
345 smoking behavior. *Nat. Genet.* **42**, 441–447 (2010).
- 346 38. Shi, H., Kichaev, G. & Pasaniuc, B. Contrasting the genetic architecture of 30 complex  
347 traits from summary association data. *Am. J. Hum. Genet.* **99**, 139–153 (2016).
- 348
- 349

350 **Acknowledgments** This research was carried out under the auspices of the Social Science  
351 Genetic Association Consortium (SSGAC). The research has also been conducted using the UK  
352 Biobank Resource under Application Number 11425. The study was supported by funding from  
353 the Ragnar Söderberg Foundation (E9/11 and E42/15), the Swedish Research Council (421-  
354 2013-1061), The Jan Wallander and Tom Hedelius Foundation, an ERC Consolidator Grant to  
355 Philipp Koellinger (647648 EdGe), the Pershing Square Fund of the Foundations of Human  
356 Behavior, and the NIA/NIH through grants P01-AG005842, P01-AG005842-20S2, P30-  
357 AG012810, and T32-AG000186-23 to NBER, and R01-AG042568-02 to the University of  
358 Southern California. We thank the International Cannabis Consortium, the Psychiatric Genomics  
359 Consortium, and the eQTLgen Consortium for sharing summary statistics from the GWAS of  
360 lifetime cannabis use, summary statistics from the GWAS of ADHD, and eQTL summary  
361 statistics, respectively. A full list of acknowledgments is provided in **Supplementary**  
362 **Information section 13**.

363

364 **Author Contributions** A full list of author contributions is included in **Supplementary**  
365 **Information section 13**.

366

367 **Author Information** Adam Auton, Pierre Fontanillas, David A Hinds, and Aaron Kleinman are  
368 employees of 23andMe, and Ronald Kessler has had ties to various companies in the past three  
369 years; the authors declare no other competing financial interests. Further details are provided in  
370 **Supplementary Information section 13**. Correspondence and requests for materials should be  
371 addressed to J.P.B ([jonathan.pierre.beauchamp@gmail.com](mailto:jonathan.pierre.beauchamp@gmail.com)), R.K.L. ([r.karlssonlinner@vu.nl](mailto:r.karlssonlinner@vu.nl)),  
372 D.J.B ([daniel.benjamin@gmail.com](mailto:daniel.benjamin@gmail.com)) or P.D.K. ([p.d.koellinger@vu.nl](mailto:p.d.koellinger@vu.nl)).

373

374 **Data Availability** Upon publication, results can be downloaded from the SSGAC website  
375 (<http://thessgac.org/data>).

376

377

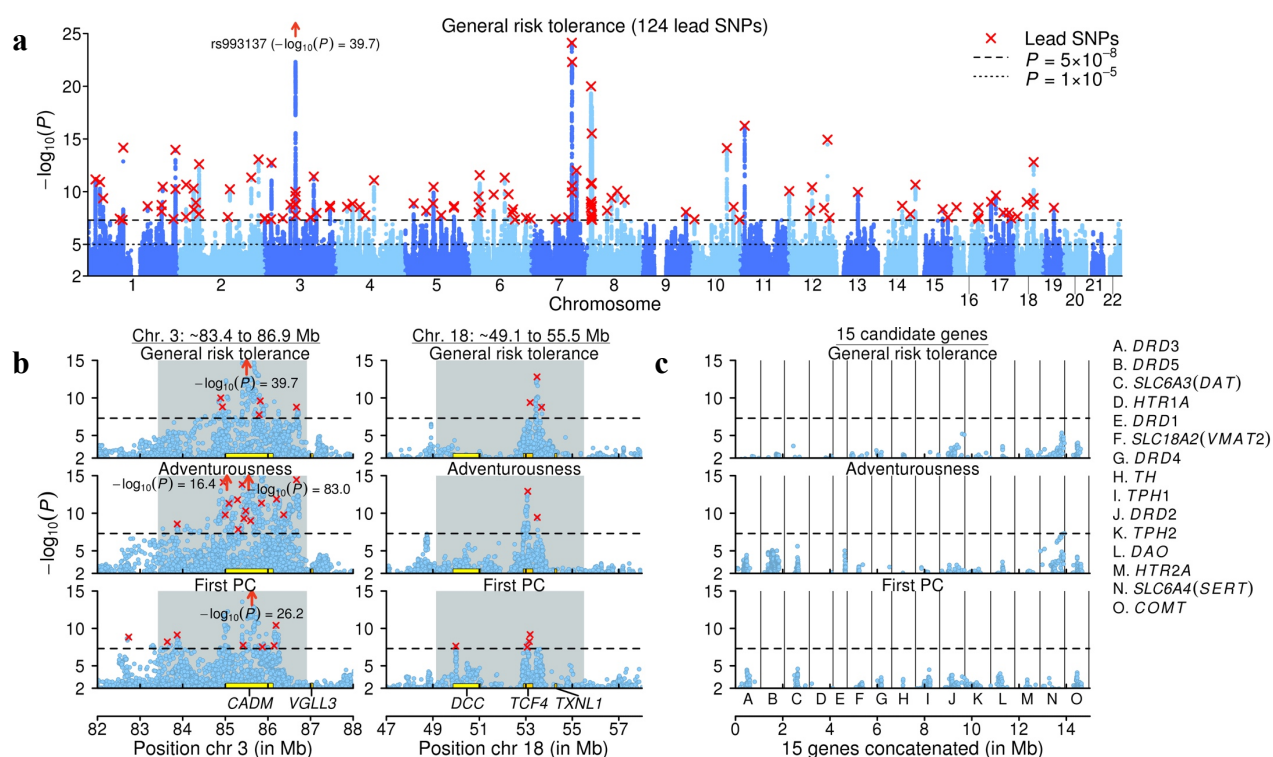

378 **Figure 1 | Manhattan plots.** In all panels, the x-axis is chromosomal position; the y-axis is the  
 379 significance on a  $-\log_{10}$  scale; the horizontal dashed line marks the threshold for genome-wide  
 380 significance ( $P = 5 \times 10^{-8}$ ); and each approximately independent (pairwise  $r^2 < 0.1$ ) genome-wide  
 381 significant association (“lead SNP”) is marked by a red  $\times$ . **a**, Manhattan plots for the discovery  
 382 GWAS of general risk tolerance. **b**, Local Manhattan plots of two genomic regions that contain  
 383 lead SNPs for all seven of our GWAS. The gray background marks the locations of long-range  
 384 LD or candidate inversion regions. **c**, Local Manhattan plots of the loci around the 15 most  
 385 commonly tested candidate genes in the prior literature on the genetics of risk tolerance. Each  
 386 locus comprises all SNPs within 500 kb of the gene’s borders that are in LD ( $r^2 > 0.1$ ) with a  
 387 SNP in the gene. The 15 plots are concatenated and shown together in the panel, divided by the  
 388 black vertical lines. The 15 genes are not particularly strongly associated with general risk  
 389 tolerance or the risky behaviors, as can be seen by comparing the results within each row across  
 390 panels **b** and **c** (the three rows correspond to the GWAS of general risk tolerance,  
 391 adventurousness, and the first PC of the four risky behaviors).

392

393

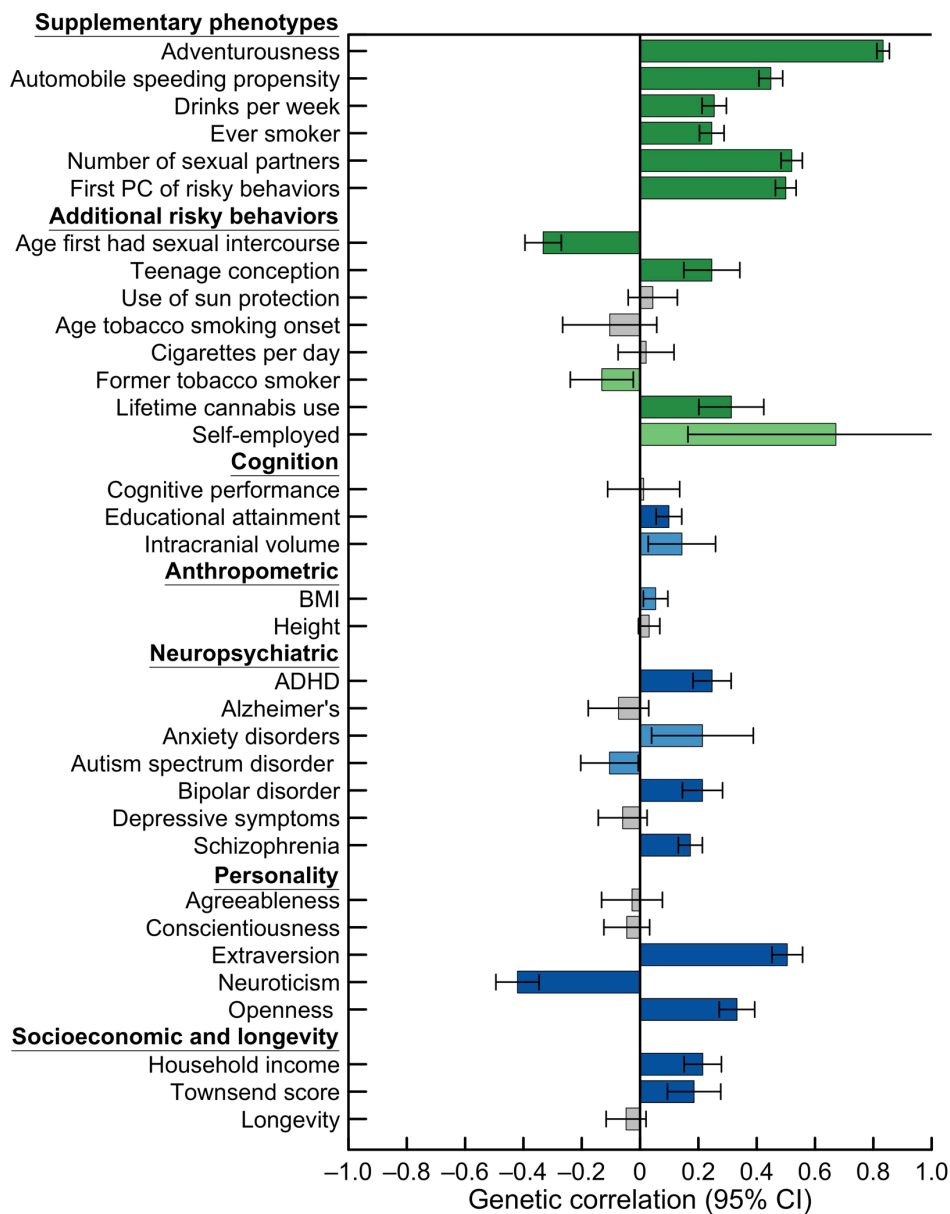

394

395 **Figure 2 | Genetic correlations with general risk tolerance.** The genetic correlations were  
 396 estimated using bivariate LD Score (LDSC) regression<sup>9</sup>. Error bars show 95% confidence  
 397 intervals. For the supplementary phenotypes and the additional risky behaviors, green bars  
 398 represent significant estimates with the expected signs, where higher risk tolerance is associated  
 399 with riskier behavior. For the other phenotypes, blue bars represent significant estimates. Light  
 400 green and light blue bars represent genetic correlations that are statistically significant at the 5%  
 401 level, and dark green and dark blue bars represent correlations that are statistically significant  
 402 after Bonferroni correction for 34 tests (the total number of phenotypes tested). Grey bars  
 403 represent correlations that are not statistically significant at the 5% level.



**a**

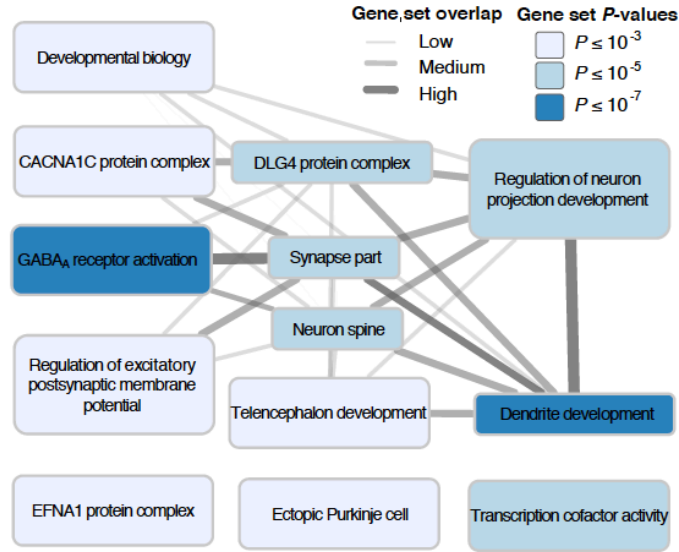

**b**

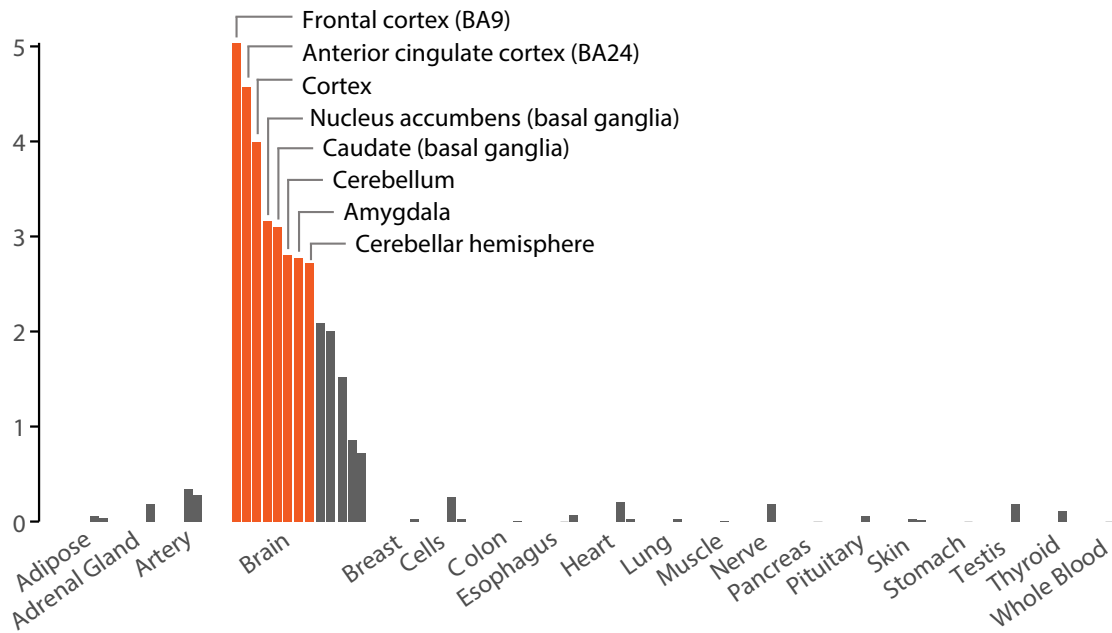

404 **Figure 3 | Results from selected biological analyses. a**, DEPICT gene-set enrichment diagram.  
 405 We identified 93 reconstituted gene sets that are significantly enriched ( $FDR < 0.01$ ) for genes  
 406 overlapping loci associated with general risk tolerance; using the Affinity Propagation method<sup>36</sup>,  
 407 these were grouped into the 13 clusters displayed in the graph. Each cluster was named after the  
 408 most significant gene set it contained, and each cluster's color represents the permutation  $P$  value  
 409 of its most significant gene set. The “synapse part” cluster includes the gene set “glutamate  
 410 receptor activity,” and several members of the “GABA<sub>A</sub> receptor activation” cluster are defined  
 411 by gamma-aminobutyric acid signaling. Overlap between the named representatives of two

412 clusters is represented by an edge. Edge width represents the Pearson correlation  $\rho$  between the  
413 two respective vectors of gene membership scores ( $\rho < 0.3$ , no edge;  $0.3 \leq \rho < 0.5$ , thin edge;  $0.5$   
414  $\leq \rho < 0.7$ , intermediate edge;  $\rho \geq 0.7$ , thick edge). **b**, Results of DEPICT tissue enrichment  
415 analysis using GTEx data. The panel shows whether the genes overlapping loci associated with  
416 general risk tolerance are significantly overexpressed (relative to genes in random sets of loci  
417 matched by gene density) in various tissues. Tissues are grouped by organ or tissue type. The  
418 orange bars correspond to tissues with significant overexpression (FDR < 0.01). The y-axis is the  
419 significance on a  $-\log_{10}$  scale.  
420  
421

**Table 1 | GWAS results**

| GWAS                                  | Cohorts analyzed                  | <i>n</i> | Mean $\chi^2$ | LD Score intercept ( <i>SE</i> ) | # lead SNPs | SNP $h^2$ ( <i>SE</i> ) |
|---------------------------------------|-----------------------------------|----------|---------------|----------------------------------|-------------|-------------------------|
| General risk tolerance (disc. GWAS)   | UKB; 23andMe                      | 939,908  | 1.85          | 1.04 (0.01)                      | 124         | 0.046 (0.001)           |
| General risk tolerance (rep. GWAS)    | 10 indep. cohorts                 | 35,445   | 1.03          | 1.00 (0.07)                      | 0           | --                      |
| General risk tolerance (disc. + rep.) | UKB; 23andMe; 10 indep. cohorts   | 975,353  | 1.87          | 1.04 (0.01)                      | 132         | 0.045 (0.001)           |
| Adventurousness                       | 23andMe                           | 557,923  | 1.98          | 1.05 (0.01)                      | 167         | 0.098 (0.002)           |
| Automobile speeding propensity        | UKB                               | 404,291  | 1.53          | 1.03 (0.01)                      | 42          | 0.079 (0.003)           |
| Drinks per week                       | UKB                               | 414,343  | 1.61          | 1.03 (0.01)                      | 85          | 0.085 (0.003)           |
| Ever smoker                           | UKB; TAG Consortium <sup>37</sup> | 518,633  | 1.97          | 1.05 (0.01)                      | 223         | 0.109 (0.003)           |
| Number of sexual partners             | UKB                               | 370,711  | 1.77          | 1.04 (0.01)                      | 118         | 0.128 (0.003)           |
| First PC of the four risky behaviors  | UKB                               | 315,894  | 1.77          | 1.05 (0.01)                      | 106         | 0.156 (0.004)           |

The table provides an overview of the GWAS of our primary and supplementary phenotypes. “*n*”: GWAS sample size; “Mean  $\chi^2$ ”: mean GWAS chi-squared statistics across HapMap3 SNPs with minor allele frequency (MAF) greater than 0.01; “LD Score intercept”: estimate of the intercept from a LD Score regression<sup>11</sup> using HapMap3 SNPs with MAF greater than 0.01; “# lead SNPs”: number of lead SNPs, calculated after the associated statistics have been adjusted using the estimated LD score intercept; “SNP  $h^2$ ”: SNP heritability estimated with the Heritability Estimator from Summary Statistics (HESS) method<sup>38</sup> using 1000 Genomes phase 3 SNPs with MAF greater than 0.05; “disc.”: discovery; “rep.”: replication; “indep.”: independent.

## Authors:

Richard Karlsson Linnér<sup>1,2,3\*</sup>, Pietro Biroli<sup>4\*</sup>, Edward Kong<sup>5\*</sup>, S Fleur W Meddens<sup>1,2,3\*</sup>, Robbee Wedow<sup>6,7,8\*</sup>, Mark Alan Fontana<sup>9,10</sup>, Maël Lebreton<sup>11,12</sup>, Abdel Abdellaoui<sup>13</sup>, Anke R Hammerschlag<sup>1</sup>, Michel G Nivard<sup>13</sup>, Aysu Okbay<sup>1,3</sup>, Cornelius A Rietveld<sup>14,2,15</sup>, Pascal N Timshel<sup>16,17</sup>, Stephen P Tino<sup>18</sup>, Maciej Trzaskowski<sup>19</sup>, Ronald de Vlaming<sup>1,2,3</sup>, Christian L Zünd<sup>4</sup>, Yanchun Bao<sup>20</sup>, Laura Buzdugan<sup>21,22</sup>, Ann H Caplin<sup>23</sup>, Chia-Yen Chen<sup>24,25,26</sup>, Peter Eibich<sup>27,28,29</sup>, Pierre Fontanillas<sup>30</sup>, Juan R Gonzalez<sup>31,32,33</sup>, Peter K Joshi<sup>34</sup>, Ville Karhunen<sup>35</sup>, Aaron Kleinman<sup>30</sup>, Remy Z Levin<sup>36</sup>, Christina M Lill<sup>37,38</sup>, Gerardus A Meddens<sup>39</sup>, Gerard Muntané<sup>40</sup>, Sandra Sanchez-Roige<sup>41</sup>, Frank J van Rooij<sup>15</sup>, Erdogan Taskesen<sup>1</sup>, Yang Wu<sup>19</sup>, Futao Zhang<sup>19</sup>, *23andMe Research Team, eQTLgen Consortium, International Cannabis Consortium, Psychiatric Genomics Consortium, Social Science Genetic Association Consortium*, Adam Auton<sup>30</sup>, Jason D Boardman<sup>8,7</sup>, David W Clark<sup>34</sup>, Andrew Conlin<sup>42</sup>, Conor C Dolan<sup>13</sup>, Urs Fischbacher<sup>43,44</sup>, Patrick JF Groenen<sup>45,2</sup>, Kathleen Mullan Harris<sup>46,47</sup>, Gregor Hasler<sup>48</sup>, Albert Hofman<sup>15,49</sup>, Mohammad A Ikram<sup>15</sup>, Sonia Jain<sup>50</sup>, Robert Karlsson<sup>51</sup>, Ronald C Kessler<sup>52</sup>, Maarten Kooyman<sup>53</sup>, James MacKillop<sup>54,55</sup>, Minna Männikkö<sup>35</sup>, Carlos Morcillo-Suarez<sup>40</sup>, Matthew B McQueen<sup>56</sup>, Klaus M Schmidt<sup>57</sup>, Melissa C Smart<sup>20</sup>, Matthias Sutter<sup>58,59</sup>, A Roy Thurik<sup>14,2,60</sup>, Andre G Uitterlinden<sup>61</sup>, Jon White<sup>62</sup>, Harriet de Wit<sup>63</sup>, Jian Yang<sup>19,64</sup>, Lars Bertram<sup>37,65,66</sup>, Dorret Boomsma<sup>13</sup>, Tõnu Esko<sup>67</sup>, Ernst Fehr<sup>22</sup>, David A Hinds<sup>30</sup>, Magnus Johannesson<sup>68</sup>, Meena Kumari<sup>20</sup>, David Laibson<sup>5</sup>, Patrik KE Magnusson<sup>51</sup>, Michelle N Meyer<sup>69</sup>, Arcadi Navarro<sup>40,70</sup>, Abraham A Palmer<sup>41</sup>, Tune H Pers<sup>16,17</sup>, Danielle Posthuma<sup>1,71</sup>, Daniel Schunk<sup>72</sup>, Murray B Stein<sup>41,50</sup>, Rauli Svento<sup>42</sup>, Henning Tiemeier<sup>15</sup>, Paul RHJ Timmers<sup>34</sup>, Patrick Turley<sup>25,26,73</sup>, Robert J Ursano<sup>74</sup>, Gert G Wagner<sup>75,28</sup>, James F Wilson<sup>34,76</sup>, Jacob Gratten<sup>19</sup>, James J Lee<sup>77</sup>, David Cesarini<sup>78</sup>, Daniel J Benjamin<sup>9,73,79</sup>§, Philipp D Koellinger<sup>1,3,80</sup>§, Jonathan P Beauchamp<sup>18\*</sup>§

\* Lead analysts; authors 2-5 listed alphabetically.

§ These authors oversaw this work.

- <sup>1</sup> Department of Complex Trait Genetics, Center for Neurogenomics and Cognitive Research, Amsterdam Neuroscience, VU University Amsterdam, De Boelelaan 1085, Amsterdam, 1081 HV, The Netherlands
- <sup>2</sup> Erasmus University Rotterdam Institute for Behavior and Biology, Erasmus School of Economics, Erasmus University Rotterdam, Burgemeester Oudlaan 50, Rotterdam, 3062 PA Rotterdam, The Netherlands
- <sup>3</sup> School of Business and Economics, VU University Amsterdam, De Boelelaan 1105, Amsterdam, 1081 HV, The Netherlands
- <sup>4</sup> Department of Economics, University of Zurich, Schönberggasse 1, Zurich, 8001, Switzerland
- <sup>5</sup> Economics, Harvard University, 1805 Cambridge St, Cambridge, MA 02138, USA
- <sup>6</sup> Institute for Behavioral Genetics, University of Colorado Boulder, 1480 30th Street, Boulder, CO 80309, USA
- <sup>7</sup> Institute of Behavioral Science, University of Colorado Boulder, 1440 15th Street, Boulder, CO 80309, USA
- <sup>8</sup> Department of Sociology, University of Colorado Boulder, UCB 327, Boulder, CO 80309, USA
- <sup>9</sup> Center for the Advancement of Value in Musculoskeletal Care, Hospital for Special Surgery, 535 East 70th Street, New York, NY 10021, USA
- <sup>10</sup> Center for Economic and Social Research, University of Southern California, 635 Downey Way, Los Angeles, CA 90089, USA
- <sup>11</sup> Amsterdam School of Economics, University of Amsterdam, Roetersstraat 11, Amsterdam, 1018 WB, The Netherlands
- <sup>12</sup> Amsterdam Brain and Cognition, University of Amsterdam, Nieuwe Achtergracht 129B, Amsterdam, 1001 NK, Netherlands
- <sup>13</sup> Biological psychology, Vrije Universiteit Amsterdam, van der Boechorstraat 1, Amsterdam, 1087 BT, The Netherlands
- <sup>14</sup> Department of Applied Economics, Erasmus School of Economics, Erasmus University Rotterdam, Burgemeester Oudlaan 50, Rotterdam, 3062 PA, The Netherlands
- <sup>15</sup> Department of Epidemiology, Erasmus Medical Center, Wytemaweg 80, Rotterdam, 3015 GE, The Netherlands
- <sup>16</sup> Novo Nordisk Foundation Centre for Basic Metabolic Research, University of Copenhagen, Copenhagen, 2200, Denmark
- <sup>17</sup> Department of Epidemiology Research, Statens Serum Institut, Copenhagen, 2300, Denmark
- <sup>18</sup> Department of Economics, University of Toronto, 150 St. George St., Toronto, Ontario, M5S 3G7, Canada
- <sup>19</sup> Institute for Molecular Bioscience, The University of Queensland, Brisbane, 4072, Australia
- <sup>20</sup> Institute for Social & Economic Research, University of Essex, Wivenhoe Park, Colchester, CO4 3SQ, UK
- <sup>21</sup> Seminar for Statistics, Department of Mathematics, ETH Zurich, Raemistrasse 101, Zurich, 8092, Switzerland
- <sup>22</sup> Department of Economics, University of Zurich, Bluemlisalpstrasse 10, Zurich, 8006, Switzerland
- <sup>23</sup> Stuyvesant High School, New York, NY 10282, USA
- <sup>24</sup> Psychiatric & Neurodevelopmental Genetics Unit, Massachusetts General Hospital, Boston, MA 02114, USA
- <sup>25</sup> Analytical and Translational Genetics Unit, Massachusetts General Hospital, Richard B. Simches Research building, 185 Cambridge St, CPZN-6818, Boston, MA 02114, USA
- <sup>26</sup> Stanley Center for Psychiatric Genomics, The Broad Institute at Harvard and MIT, 75 Ames St, Cambridge, MA 02142, USA
- <sup>27</sup> Nuffield Department of Population Health, University of Oxford, Old Road Campus, Oxford, OX3 7LF, UK
- <sup>28</sup> Socio-Economic Panel Study, DIW Berlin, Mohrenstr. 58, Berlin, 10117, Germany
- <sup>29</sup> Max Planck Institute for Demographic Research, Konrad-Zuse-Str. 1, Rostock, 18057, Germany
- <sup>30</sup> Research, 23andMe, Inc., 899 W Evelyn Ave, Mountain View, CA 94041, USA
- <sup>31</sup> Barcelona Institute for Global Health (ISGlobal), Barcelona, 8003, Spain
- <sup>32</sup> Universitat Pompeu Fabra (UPF), Barcelona, 8003, Spain
- <sup>33</sup> CIBER Epidemiología y Salud Pública (CIBERESP), Madrid, 280229, Spain
- <sup>34</sup> Centre for Global Health Research, Usher Institute for Population Health Sciences and Informatics, University of Edinburgh, Teviot Place, Edinburgh, EH8 9AG, Scotland
- <sup>35</sup> Center for Life Course Health Research, University of Oulu, Aapistie 5, Oulu, 90220, Finland
- <sup>36</sup> Department of Economics, University of California San Diego, La Jolla, CA 92093, USA
- <sup>37</sup> Institute of Neurogenetics, University of Lübeck, Maria-Goeppert-Str. 1, Lübeck, 23562, Germany
- <sup>38</sup> Institute of Human Genetics, University of Lübeck, Ratzeburger Allee 160, Lübeck, 23538, Germany
- <sup>39</sup> Team Loyalty BV, Debbemeerstraat 25, Hoofddorp, 2131 HE, The Netherlands
- <sup>40</sup> Departament de Ciències Experimentals i de la Salut, Universitat Pompeu Fabra, Dr. Aiguader, 88, Barcelona, 8003, Spain

- 
- <sup>41</sup> Psychiatry, University of California San Diego, 9500 Gilman Drive, La Jolla, CA 92093, USA
- <sup>42</sup> Department of Economics and Finance, Oulu Business School, University of Oulu, Oulu, 90570, Finland
- <sup>43</sup> Department of Economics, University of Konstanz, Universitätsstraße 10, Konstanz, 78457, Germany
- <sup>44</sup> Thurgau Institute of Economics, Hauptstrasse 90, Kreuzlingen, 8280, Switzerland
- <sup>45</sup> Department of Econometrics, Erasmus University Rotterdam, Burgemeester Oudlaan 50, Rotterdam, 3062 PA Rotterdam, The Netherlands
- <sup>46</sup> Department of Sociology, University of North Carolina at Chapel Hill, 201 Hamilton Hall CB #3210, Chapel Hill, NC 27599, USA
- <sup>47</sup> Carolina Population Center, University of North Carolina at Chapel Hill, 123 West Franklin St., Suite 2190, Chapel Hill, NC 27516, USA
- <sup>48</sup> Division of Molecular Psychiatry, Translational Research Center, University Hospital of Psychiatry, University of Bern, Bolligenstrasse 111, Bern, 3000, Switzerland
- <sup>49</sup> Department of Epidemiology, Harvard T.H. Chan School of Public Health, Boston, MA 02115, USA
- <sup>50</sup> Family Medicine and Public Health, University of California San Diego, 9500 Gilman Drive, La Jolla, CA 92093, USA
- <sup>51</sup> Department of Medical Epidemiology and Biostatistics, Karolinska Institutet, Nobels väg 12a, Stockholm, 171 77, Sweden
- <sup>52</sup> Department of Health Care Policy, Harvard Medical School, 180 Longwood Ave., Boston, MA 02115, USA
- <sup>53</sup> SURFsara, Science Park 140, Amsterdam, 1098 XG, The Netherlands
- <sup>54</sup> Peter Boris Centre for Addictions Research, McMaster University/St. Joseph's Healthcare Hamilton, 100 West 5th Street, Hamilton, Ontario, L8P 3R2, Canada
- <sup>55</sup> Homewood Research Institute, 150 Delhi Street, Riverslea Building, Guelph, Ontario, N1E 6K9, Canada
- <sup>56</sup> Department of Integrative Physiology, University of Colorado Boulder, 354 UCB, Boulder, CO 80309, USA
- <sup>57</sup> Department of Economics, University of Munich, Ludwigstrasse 28, Munich, 80539, Germany
- <sup>58</sup> Department of Economics, University of Cologne, Albert-Magnus-Platz, Cologne, 50923, Germany
- <sup>59</sup> Experimental Economics Group, Max Planck Institute for Research into Collective Goods, Schumacher Strasse 10, Bonn, D-51113, Germany
- <sup>60</sup> Montpellier Business School, Montpellier, 34080, France
- <sup>61</sup> Internal Medicine, Erasmus Medical Center, Wytemaweg 80, Rotterdam, 3015 CN, The Netherlands
- <sup>62</sup> UCL Genetics Institute, Department of Genetics, Evolution and Environment, University College London, Darwin Building, Gower Street, London, WC1E 6BT, UK
- <sup>63</sup> Psychiatry and Behavioral Neuroscience, University of Chicago, 5841 S. Maryland Ave., MC 3077, Rm L485, Chicago, IL 60637, USA
- <sup>64</sup> Queensland Brain Institute, The University of Queensland, Brisbane, 4072, Australia
- <sup>65</sup> Institute of Cardiogenetics, University of Lübeck, Maria-Goeppert-Str. 1, Lübeck, 23562, Germany
- <sup>66</sup> School of Public Health, Imperial College London, South Kensington Campus, London, SW7 2AZ, UK
- <sup>67</sup> Estonian Genome Center, University of Tartu, Tartu, 51010, Estonia
- <sup>68</sup> Department of Economics, Stockholm School of Economics, Box 6501, Stockholm, 113 83, Sweden
- <sup>69</sup> Center for Translational Bioethics and Health Care Policy, Geisinger Health System, Danville, PA 17822, USA
- <sup>70</sup> Institució Catalana de Recerca i Estudis Avançats (ICREA), Parc de Recerca Biomèdica. Carrer Dr. Aiguader, 88, Barcelona, 8003, Spain
- <sup>71</sup> Department of Clinical Genetics, VU Medical Centre, De Boelelaan 1085, Amsterdam, 1081 HV, The Netherlands
- <sup>72</sup> Department of Economics, Johannes Gutenberg University, Jakob-Welder-Weg 4, Mainz, 55128, Germany
- <sup>73</sup> Behavioral and Health Genomics Center, University of Southern California, 635 Downey Way, Los Angeles, CA 90089, USA
- <sup>74</sup> Psychiatry, Uniformed Services University Health Science, Bethesda, MD 20814, USA
- <sup>75</sup> Max Planck Institute for Human Development, Lentzeallee 94, Berlin, 14195, Germany
- <sup>76</sup> MRC Human Genetics Unit, Institute of Genetics and Molecular Medicine, University of Edinburgh, Western General Hospital, Edinburgh, EH4 2XU, Scotland
- <sup>77</sup> Department of Psychology, University of Minnesota Twin Cities, 75 East River Parkway, Minneapolis, MN 55455, USA
- <sup>78</sup> Department of Economics, New York University, 19 W 4th St, 6 FL, NY 10012, USA
- <sup>79</sup> National Bureau of Economic Research, 1050 Massachusetts Ave, Cambridge, MA 02138, USA

---

<sup>80</sup> German Institute for Economic Research, DIW Berlin, Mohrenstr. 58, Berlin, 10117, Germany
